Article

# Meta-analysis of transcriptomes in insects showing density-dependent polyphenism

Kouhei Toga <sup>1,2</sup> and Hidemasa Bono <sup>1,2\*</sup>

<sup>1</sup> Laboratory of BioDX, PtBio Co-Creation Research Center, Genome Editing Innovation Center, Hiroshima University, 3-10-23 Kagamiyama, Higashi-Hiroshima city, Hiroshima, 739-0046, Japan

<sup>2</sup> Laboratory of Genome Informatics, Graduate School of Integrated Sciences for Life, Hiroshima University, 3-10-23 Kagamiyama, Higashi-Hiroshima city, Hiroshima, 739-0046, Japan; [bonohu@hiroshima-u.ac.jp](mailto:bonohu@hiroshima-u.ac.jp); [tog-chemi@hiroshima-u.ac.jp](mailto:tog-chemi@hiroshima-u.ac.jp)

\* Correspondence: [bonohu@hiroshima-u.ac.jp](mailto:bonohu@hiroshima-u.ac.jp); Tel.: +81 82 424 4013

**Simple Summary:** Population density can be an environmental cue to induce modification of insect morphology, physiology, and behavior. This phenomenon is called density-dependent plasticity. Aphids and locusts exhibit textbook examples of density-dependent plasticity but there is a lack of integrative understanding for insect density-dependent plasticity. To address this problem, we combined public gene expression data obtained from multiple studies and re-analyzed them (this process is called meta-analysis). The present study provides additional insight into the regulatory mechanisms of density-dependent plasticity, demonstrating the effectiveness of meta-analyses of public transcriptomes.

**Abstract:** With increasing public data, a statistical analysis approach called meta-analysis, which combines transcriptome results obtained from multiple studies, has succeeded in providing novel insights into targeted biological processes. Locusts and aphids are representative of insect groups that exhibit density-dependent plasticity. Although the physiological mechanisms underlying density-dependent polyphenism have been identified in aphids and locusts, the underlying molecular mechanisms remain largely unknown. In this study, we performed a meta-analysis of public transcriptomes to gain additional insights into the molecular underpinning of density-dependent plasticity. We collected RNA sequencing data of aphids and locusts from public databases and detected differentially expressed genes (DEGs) between crowded and isolated conditions. Gene set enrichment analysis was performed to reveal the characteristics of the DEGs. DNA replication (GO:0006260), DNA metabolic processes (GO:0006259), and mitotic cell cycle (GO:0000278) were enriched in response to crowded conditions. To date, these processes have scarcely been the focus of research. The importance of the oxidative stress response and neurological system modifications under isolated conditions has been highlighted. These biological processes, clarified by meta-analysis, are thought to play key roles in the regulation of density-dependent plasticity.

**Keywords:** Meta-analysis; density-dependent polyphenism; aphid; locust; RNA sequencing; gene set enrichment analysis

## 1. Introduction

Phenotypic plasticity is the ability to respond adaptively to environmental variations by producing more than one phenotype for a single genotype [1,2]. If two or more distinct phenotypes are produced, this is called polyphenism [3]. Various environmental conditions can be cues to induce plastic phenotype changes, population density being one of those [3–6]. Locusts and aphids are representative insect groups for which densi-

ty-dependent plasticity is considered to have contributed to their evolutionary success [7,8]. The aphids exhibit wing polyphenotypes and locusts exhibit polyphenisms in body color and behavior (e.g., gregarious and flight ability).

Physiological mechanisms underlying density-dependent polyphenism have been revealed in aphids [7] and locusts [9]. Furthermore, a recent transcriptome analysis has revealed gene expression profiles in response to different density conditions. RNA sequencing (RNA-seq) revealed that a laterally transferred viral gene is responsible for switching wing polyphenic phenotypes [10]. In locusts, expressed sequence tag (EST), microarray, and RNA-seq revealed differentially expressed genes (DEGs), including juvenile hormone (JH)-binding protein [11], heat-shock proteins [12], oxidative stress response genes [12], neurotransmitter-related genes [13], catecholamine metabolic pathway genes [14], and the microtubule cytoskeleton [15]. However, the common molecules involved in all locust species exhibiting density-dependent polyphenism remain largely unknown. Additionally, an inclusive analysis of aphids and locusts was not performed.

Meta-analysis that combines the transcriptome results from multiple studies is thought to be effective in providing additional insights into density-dependent polyphenisms because meta-analysis can uncover new information that could not be achieved with conventional hypothesis-driven research methods. Meta-analysis of transcriptomes is effective in revealing novel gene expression profiles involved in oxidative and hypoxia-inducible responses in insects and humans [16–18]. As mentioned above, the amount of transcriptome data related to density-dependent polyphenism is sufficient to execute the meta-analysis. In the present study, we conducted a meta-analysis of public transcriptomes using RNA-seq data obtained from five *Schistocerca* species, the pea aphid *Acyrtosiphon pisum*, and the migratory locust *Locusta migratoria*. We identified DEGs between crowded and isolated conditions and performed gene set enrichment analysis to understand the characteristics of the DEGs.

## 2. Materials and Methods

### 2.1. Curation of public gene expression data

Expression data were searched for in the public databases Gene Expression Omnibus (GEO) [19] and DBCLS SRA (<https://sra.dbcls.jp/>), and RNA-seq data archived in the Sequence Read Archive (SRA) [20] using the keywords including crowding, density, polyphenism, and gregarious. The datasets examined in this study were selected based on the following criteria: RNA-seq data obtained from crowded or isolated insect species showing density-dependent polyphenism.

### 2.2. RNA-seq data retrieval, processing, and quantification

SRA retrieval and conversion to FASTQ files was performed using the prefetch and fasterq-dump programs in the SRA Toolkit (v.2.9.6) [21], respectively. To decrease disk space usage, the obtained FASTQ files were immediately compressed using pigz (v. 2.4). For the trimming and quality control, Trim Galore! (v.0.6.6) [22] and Cutadapt (v.3.4) [23] software was used.

### 2.3. Quantification of gene expression level

In species whose genomic information is available (the pea aphid *Acyrtosiphon pisum* and the migratory locust *Locusta migratoria*), RNA-seq reads were mapped to reference genome sequences using HISAT2 (v.2.2.1) [24]. Quantification of the mapped data was performed using StringTie (2.1.5) [25], and the values of transcripts per million (TPM) were used as quantitative values of gene expression. In species with genomic information not available (all species of grasshopper *Schistocerca*), TPM values were calculated using salmon (v.1.5.0) [26]. Transcriptome assemblies required for salmon were retrieved from the Transcriptome Shotgun Assembly (TSA) database (Table S1). If there were no available assemblies in TSA, *de novo* transcriptome assembly was performed us-

ing Trinity (v2.13.1) program with Docker environment utilizing scripts in the Systematic Analysis for Quantification of Everything (SAQE) repository [16].

#### 2.4. The detection of differentially expressed genes

To evaluate the changes in expression of each gene, the expression ratio was calculated using TPM paired with crowded and isolated transcriptomes (CI ratio). The CI ratio for each gene was calculated using Equation (1):

$$\text{CI ratio} = \log_{10}(\text{TPM}_{\text{crowded}} + 0.01) - \log_{10}(\text{TPM}_{\text{isolated}} + 0.01), \quad (1)$$

This calculation was performed for all pairs of crowded and isolated transcriptomes. Pairs of transcriptome data used for comparison are shown in Table S2. The value “0.01” was added to the TPM for each gene to convert zero into a logarithm. Crowded and isolated ratios (CI-ratio) were classified as “upregulated,” “downregulated,” or “unchanged” according to the thresholds. Genes with a CI ratio greater than 0.301 (2-fold expression change) were treated as “upregulated”. Genes whose CI ratio was under – 0.301 (0.5-fold expression changes) were treated as “downregulated”. Others were treated as “unchanged”. To reveal the DEGs between the crowded and isolated conditions, the crowded and isolated score (CI score) of each gene was calculated by subtracting the number of sample pairs with “downregulated” from those of “upregulated,” as shown in Equation (2):

$$\text{CI score} = \text{count number}_{\text{upregulated}} - \text{count number}_{\text{downregulated}} \quad (2)$$

The calculation method for CI ratios and CI scores was based on a previous study [17] ([https://github.com/no85j/hypoxia\\_code/blob/master/CodingGene/HN-score.ipynb](https://github.com/no85j/hypoxia_code/blob/master/CodingGene/HN-score.ipynb)).

#### 2.5. Gene annotation and gene set enrichment analysis

To extract the transcript sequence from the genome sequence, GFFread (v0.12.1) [27] was used with the reference genome (*Acyrtosiphon pisum*: GCF\_005508785.1 and *L. migratoria*: GCA\_000516895.1). Transcript sequences were collected from the TSA database of the other species examined in this study (Table S1). Transcript sequences of *Schistocerca gregaria* were obtained by *de novo* assembly using Trinity, as described above (2.3. Quantification of gene expression level). TransDecoder (v5.5.0) (<https://transdecoder.github.io/>: Accessed on 22 June 2021) was used to identify coding regions and translate them into amino acid sequences. The protein BLAST (BLASTP) program with an E-value cutoff of 0.1 in the NCBI BLAST software package (v2.6.0) was used to determine the orthologous gene relationship among species. Ensembl Biomart was used to obtain stable protein IDs and gene names from *D. melanogaster* gene set (BDGP6.32).

Gene set enrichment analysis was performed by Metascape [28] using the DEGs obtained in section 2.3.

### 3. Results

#### 3.1. Data collection of transcriptomes in density-dependent polyphenism

To compare gene expression under crowded and isolated conditions, we retrieved transcriptome data acquired under different density conditions. Consequently, 66 pairs of transcriptome data were collected from the public databases (Table 1). Full information about the dataset used in this study is provided in Table S2. These data comprised transcriptomes from seven insect species, including aphids and locusts. The tissues used to obtain these transcriptomes are shown in Table 1.

Table 1 Summary of datasets used in this study

146

| Species                              | Number of RNA sequencing files (under crowded condition) | Number of RNA sequencing files (under isolated condition) | Tissue                               |
|--------------------------------------|----------------------------------------------------------|-----------------------------------------------------------|--------------------------------------|
| <i>Schistocerca gregaria</i>         | 1                                                        | 1                                                         | CNS                                  |
| <i>Acyrtosiphon pisum</i>            | 8                                                        | 8                                                         | whole                                |
| <i>Schistocerca americana</i>        | 10                                                       | 10                                                        | head, thorax                         |
| <i>Schistocerca nitens</i>           | 10                                                       | 10                                                        | head, thorax                         |
| <i>Schistocerca piceifrons</i>       | 10                                                       | 10                                                        | head, thorax                         |
| <i>Schistocerca serialis cubense</i> | 10                                                       | 10                                                        | head, thorax                         |
| <i>Locusta migratoria</i>            | 17                                                       | 17                                                        | brain, Integument, thoracic ganglion |

147

### 3.2. Gene set enrichment analysis

148

After the expression ratio (CI ratio) was calculated for each species, as described in the Materials and Methods section 2.4, we integrated the CI ratio table and obtained the CI ratio values of 2652 genes (Table S3). During this process, orthologous relationships among species were determined using BLAST. First, we performed a BLASTP search using all genes in *S. gregaria* as queries against those in each species examined in this study. Next, we performed searches for all genes vs. all BLASTP between *D. melanogaster* and *S. gregaria* to annotate the gene names of each species into those of *D. melanogaster*.

149

150

151

152

153

154

155

CI scores were calculated based on the CI ratio table (Table S4) and we listed the top 1% of genes with the highest and lowest CI scores (Table 2 and Table 3, respectively). The complete lists in which the CI scores are described are accessible from figshare (<https://doi.org/10.6084/m9.figshare.19689244.v1>). We selected 97 upregulated genes and 199 downregulated genes as DEGs (CI score thresholds: 8 and -8). Using these DEGs, we performed gene set enrichment analysis using Metascape to identify their characteristics. Metascape showed that “DNA replication” (GO:0006260; *CG14803*, *CG2990*, *Psf3*, *CG8142*, *RnrL*, *Psf1*, *Pol31*, *Mcm7*, *Mcm2*, *E2f1*, *DNApol-alpha60*, *dup*), “DNA metabolic process” (GO:0006259; *CG14803*, *CG2990*, *Psf3*, *CG8142*, *RnrL*, *FANCI*, *pds5*, *Psf1*, *Pol31*, *Gen*, *Mcm7*, *Mcm2*, *pch2*, *Fancl*, *CG5285*, *E2f1*, *DNApol-alpha60*, *dup*), and “mitotic cell cycle” (GO:0000278; *Psf3*, *sofe*, *borr*, *Incenp*, *pds5*, *SmD3*, *tum*, *Klp61F*, *Psf1*, *Pol31*, *eco*, *polo*, *Mcm2*, *E2f1*, *jar*, *Cap-D2*, *DNApol-alpha60*, *dup*, *Zwilch*) were enriched significantly in up-regulated DEGs (Figure 1A). In addition, we searched for genes that were likely to be associated with density-dependent polyphenism (Table 2). *Jheh* is one of the most important enzymes involved in JH inactivation, as reported by Iga and Kataoka 2012 [29]. JH plays a central role in the regulation of polyphenism. *Ebony* (*e*) shows a high CI score for the upregulated DEGs. This gene is highly expressed in gregarious *L. gregaria*, leading to yellow color production [14]. Therefore, the high CI score of *e* is consistent with this result.

156

157

158

159

160

161

162

163

164

165

166

167

168

169

170

171

172

173

174

175

176

177

178

179

180

181

182

Table 2 Top 1% of genes with the highest CI scores

183

**Number of samples with expression patterns responding to the crowded condition**

| Gene_name      | upregulated | downregulated | unchanged | CI score |
|----------------|-------------|---------------|-----------|----------|
| obst-E         | 31          | 8             | 27        | 23       |
| CG14803        | 23          | 3             | 40        | 20       |
| His2A:CG33835  | 30          | 10            | 26        | 20       |
| Jheh2          | 22          | 3             | 41        | 19       |
| nw             | 27          | 8             | 31        | 19       |
| HDAC1          | 21          | 3             | 42        | 18       |
| Ugt36D1        | 24          | 7             | 35        | 17       |
| CG5321         | 22          | 7             | 37        | 15       |
| Cdep           | 21          | 6             | 39        | 15       |
| e              | 17          | 2             | 47        | 15       |
| pds5           | 19          | 4             | 43        | 15       |
| CG4572         | 21          | 7             | 38        | 14       |
| CG6765         | 16          | 2             | 48        | 14       |
| Incenp         | 23          | 9             | 34        | 14       |
| Psf3           | 21          | 7             | 38        | 14       |
| ft             | 21          | 7             | 38        | 14       |
| polo           | 19          | 5             | 42        | 14       |
| tou            | 22          | 8             | 36        | 14       |
| tum            | 19          | 5             | 42        | 14       |
| CG10175        | 22          | 9             | 35        | 13       |
| CG2990         | 20          | 7             | 39        | 13       |
| CG8173         | 18          | 5             | 43        | 13       |
| DNAPol-alpha60 | 22          | 9             | 35        | 13       |
| SmD3           | 18          | 5             | 43        | 13       |
| Ts             | 20          | 7             | 39        | 13       |
| CG8646         | 20          | 8             | 38        | 12       |

184

185

186

187

188

189

Table 3 Top 1% of genes with the lowest CI scores

190

**Number of samples with expression patterns responding to the crowded condition**

| <b>Gene_name</b> | <b>upregulated</b> | <b>downregulated</b> | <b>unchanged</b> | <b>CI score</b> |
|------------------|--------------------|----------------------|------------------|-----------------|
| CG14301          | 3                  | 28                   | 35               | -25             |
| ple              | 7                  | 31                   | 28               | -24             |
| CG9657           | 6                  | 29                   | 31               | -23             |
| Lrp4             | 3                  | 26                   | 37               | -23             |
| GluClalpha       | 5                  | 26                   | 35               | -21             |
| CG34461          | 9                  | 29                   | 28               | -20             |
| Cyp6a14          | 9                  | 28                   | 29               | -19             |
| CG10211          | 10                 | 27                   | 29               | -17             |
| Ggt-1            | 8                  | 24                   | 34               | -16             |
| Syt4             | 6                  | 22                   | 38               | -16             |
| Cralbp           | 9                  | 24                   | 33               | -15             |
| KaiR1D           | 3                  | 18                   | 45               | -15             |
| RpS5a            | 3                  | 18                   | 45               | -15             |
| Shmt             | 6                  | 21                   | 39               | -15             |
| Tcs3             | 4                  | 19                   | 43               | -15             |
| tyn              | 2                  | 17                   | 47               | -15             |
| CG13744          | 8                  | 22                   | 36               | -14             |
| CG15449          | 5                  | 19                   | 42               | -14             |
| Est-6            | 9                  | 23                   | 34               | -14             |
| KaiR1D           | 11                 | 25                   | 30               | -14             |
| Mdr49            | 7                  | 21                   | 38               | -14             |
| dpr12            | 6                  | 20                   | 40               | -14             |
| CG13643          | 7                  | 20                   | 39               | -13             |
| CG6006           | 5                  | 18                   | 43               | -13             |
| CG7246           | 2                  | 15                   | 49               | -13             |
| Cnb              | 5                  | 18                   | 43               | -13             |

191

192

193

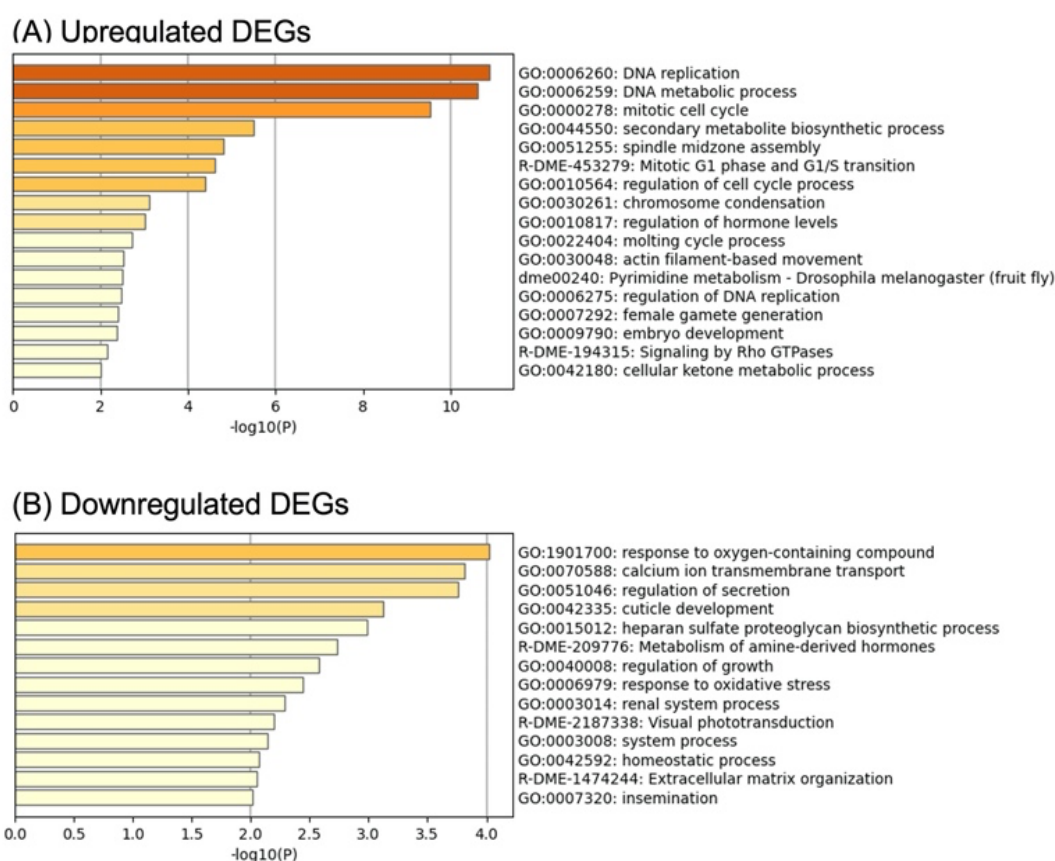

Figure 1. Results of gene set enrichment analysis in (A) upregulated DEGs and (B) downregulated DEGs

The response to oxygen-containing compounds (GO:1901700; *G9a*, *hfw*, *Shmt*, *Clic*, *Duox*, *FASN1*, *Kr-h1*, *GLaz*, *ple*, *Rab8*, *srl*, *Syn*, *CASK*, *spz*, and *dco*) was significantly enriched in the downregulated DEGs (Figure 1B). Multiple genes involved in the response to oxidative stress (GO:0006979: *Duox*, *GLaz*, *ple*, *srl*, and *spz*) were included in GO:1901700

The CI score of the *ple* gene was the second lowest (Table 3). This indicates that the expression of *ple* was higher in many isolated transcriptomes than in crowded transcriptomes. *ple* genes are known to be highly expressed under crowded conditions, inducing gregarious color and behavior [14].

Among the downregulated DEGs, the genes that are reported to function in the nervous system were conspicuous (*CG9657*: [31], *Lrp4*: [32], *GluClalpha*: [33], *Syt4*: [34]).

#### 4. Discussion

As various data acquired under different conditions are registered, manual curations are needed for meta-analysis. In this study, we collected RNA sequencing data (66 pairs) from public databases and compared their expression levels in various insect species. We believe that our meta-analysis of public RNA sequencing using this vast amount of data has led to important insights into the gene expression profile underlying density-dependent polyphenism, as discussed below.

Gene set enrichment analysis showed that DNA replication, DNA metabolic processes, and the mitotic cell cycle were enriched in response to crowded conditions (Figure 1). DNA replication and cell cycle have rarely been focused on as regulatory mecha-

nisms of density-dependent polyphenism [35]. A recent study [36] showed that the regulation of DNA replication and the cell cycle is involved in the density-dependent wing polyphenism of the planthopper *Nilaparvata lugens*. Together with this study, our results emphasize the importance of DNA replication and the cell cycle as the regulatory mechanisms of density-dependent polyphenism. Although wing polyphenism was also observed in *A. pisum*, it was not observed in locusts. Therefore, the regulation of DNA replication and cell cycle is expected to be involved in other developmental processes in locusts. Although the role of JH in aphid wing polyphenism is controversial, JH content is lower under crowded conditions than under isolated conditions in locusts [9, 37]. Therefore, Jheh2 expression in response to crowded conditions may play an important role in JH degradation.

The high expression of *ple* gene under isolated conditions was not consistent with a previous study. Although *ple* genes are known to be responsible for gregarious pigmentation in *L. migratoria*, the relationship between *ple* genes and body-color polyphenism is controversial [30]. Several downregulated DEGs (*Duox*, *GLaz*, *ple*, *srl*, and *spz*) classified under response to oxygen-containing compounds were related to the response to oxidative stress, and *ple* was included in that category. A previous microarray study showed that the expression of transcripts encoding proteins against oxidative stress damage (peroxiredoxin, 5-oxoprolinase, microsomal glutathione-S-transferase, and transaldolase) was higher in isolated locusts than in crowded locusts [12]. Rapid accumulation of oxidative stress inhibits flight sustainability in solitary *L. migratoria*, leading to variations in flight traits between solitary and gregarious locusts [38]. Therefore, the high *ple* expression under the isolated conditions in this study may result from the response to oxidative stress.

Neurological system modifications may play an important role in inducing density-dependent phenotypic changes in *S. gregaria* [12] and *L. migratoria* [15]. We found that the expression of several genes functioning in the nervous system was increased under isolated conditions (CG9657 [31], *Lrp4* [32], *GluClalpha* [33], and *Syt4* [34]). CG9657 is an SLC5A transporter expressed in glial cells and is involved in sleep behavior in *D. melanogaster* [31]. Presynaptic *Lrp4* functions to ensure normal synapse numbers in *D. melanogaster* [32]. *GluClalpha* plays an important role in the ON/OFF selectivity of the visual systems in *D. melanogaster* [33]. Syts are Ca<sup>2+</sup>-binding proteins involved in the presynaptic transmitter release [34]. These genes are also related to density-dependent behavioral changes.

## 5. Conclusions

We identified novel genes related to density-dependent polyphenism in insects using a meta-analysis of public transcriptomes. Reliable and general principles should be derived from meta-analysis because this method integrates the results of a number of studies. Therefore, our results can be applied to other species that exhibit density-dependent polyphenisms.

**Supplementary Materials:** The following supporting information can be downloaded at [www.mdpi.com/xxx/s1](http://www.mdpi.com/xxx/s1), Table S1: IDs of transcriptome assemblies used in this study, Table S2: Transcriptome dataset used in this study, Table S3: Gene expression ratios when comparing crowded and isolated conditions (CI ratio) (<https://doi.org/10.6084/m9.figshare.19689244.v1>), Table S4: Score calculated based on the CI ratio between crowded and isolated conditions (<https://doi.org/10.6084/m9.figshare.19689244.v1>).

**Author Contributions:** Conceptualization, K.T. and H.B.; methodology, K.T. and H.B.; software, K.T.; validation, K.T. and H.B.; formal analysis, K.T.; investigation, K.T.; resources, H.B.; data curation, K.T.; writing—original draft preparation, K.T.; writing—review and editing, H.B.; visualization, K.T.; supervision, H.B.; project administration, H.B.; funding acquisition, H.B. All authors have read and agreed to the published version of the manuscript.



**Funding:** This research was supported by the Center of Innovation for Bio-Digital Transformation (BioDX), a program on the open innovation platform for industry-academia co-creation (COI-NEXT), and the Japan Science and Technology Agency (JST, COI-NEXT, JPMJPF2010). 272  
273  
274

**Institutional Review Board Statement:** Not applicable. 275

**Data Availability Statement:** The data presented in this study are openly available in figshare [https://doi.org/10.6084/m9.figshare.19689244.v1]. 276  
277

**Acknowledgments:** We would like to thank all laboratory members at Hiroshima University for their valuable comments. Computations were performed on the computers at Hiroshima University Genome Editing Innovation Center. 278  
279  
280

**Conflicts of Interest:** The authors declare no conflicts of interest. The funders had no role in the study design; collection, analyses, or interpretation of data; writing of the manuscript; or decision to publish the results. 281  
282  
283

## References 284

1. West-Eberhard, M.J. Phenotypic Plasticity and the Origins of Diversity. *Annu Rev Ecol Syst* **1989**, *20*, 249–278, doi:10.1146/annurev.es.20.110189.001341. 285  
286  
287
2. Mary Jane West-Eberhard *Developmental Plasticity and Evolution*; Oxford University Press: UK, 2003. 288
3. Simpson, S.J.; Sword, G.A.; Lo, N. Polyphenism in Insects. *Curr Biol* **2011**, *21*, R738–R749, doi:10.1016/j.cub.2011.06.006. 289
4. Scott F. Gilbert; D. Epel *Ecological Developmental Biology: Integrating Epigenetics, Medicine, And Evolution*; Sinauer Associates, 2009. 290  
291
5. Toga, K.; Homma, Y.; Togawa, T. Control of the Ecdysteroid Level Plays a Crucial Role in Density-Dependent Metamorphosis in the Giant Mealworm Beetle *Zophobas Atratus*. *Dev Biol* **2021**, *473*, 71–79, doi:10.1016/j.ydbio.2021.01.014. 292  
293
6. Ozawa, T.; Ohta, K.; Shimada, M.; Okada, K.; Okada, Y. Environmental Factors Affecting Pupation Decision in the Horned Flour Beetle *Gnatoceus Cornutus*. *Zoolog Sci* **2015**, *32*, 183–187, doi:10.2108/zs140203. 294  
295
7. Ogawa, K.; Miura, T. Aphid Polyphenisms: Trans-Generational Developmental Regulation through Viviparity. *Front Physiol* **2014**, *5*, doi:10.3389/fphys.2014.00001. 296  
297
8. Wang, X.; Kang, L. Molecular Mechanisms of Phase Change in Locusts. *Annu Rev Entomol* **2014**, *59*, 225–244, doi:10.1146/annurev-ento-011613-162019. 298  
299
9. Breuer, M.; Hoste, B.; de Loof, A. The Endocrine Control of Phase Transition: Some New Aspects. *Physiol Entomol* **2003**, *28*, 3–10, doi:10.1046/j.1365-3032.2003.00313.x. 300  
301
10. Parker, B.J.; Brisson, J.A. A Laterally Transferred Viral Gene Modifies Aphid Wing Plasticity. *Curr Biol* **2019**, *29*, 2098-2103.e5, doi:10.1016/j.cub.2019.05.041. 302  
303
11. Kang, L.; Chen, X.; Zhou, Y.; Liu, B.; Zheng, W.; Li, R.; Wang, J.; Yu, J. *The Analysis of Large-Scale Gene Expression Correlated to the Phase Changes of the Migratory Locust*; 2004. 304  
305
12. Badisco, L.; Ott, S.R.; Rogers, S.M.; Matheson, T.; Knapen, D.; Vergauwen, L.; Verlinden, H.; Marchal, E.; Sheehy, M.R.J.; Burrows, M.; et al. Microarray-Based Transcriptomic Analysis of Differences between Long-Term Gregarious and Solitary Desert Locusts. *PLoS ONE* **2011**, *6*, e28110, doi:10.1371/journal.pone.0028110. 306  
307  
308
13. Chen, S.; Yang, P.; Jiang, F.; Wei, Y.; Ma, Z.; Kang, L. De Novo Analysis of Transcriptome Dynamics in the Migratory Locust during the Development of Phase Traits. *PLoS ONE* **2010**, *5*, e15633, doi:10.1371/journal.pone.0015633. 309  
310
14. Ma, Z.; Guo, W.; Guo, X.; Wang, X.; Kang, L. Modulation of Behavioral Phase Changes of the Migratory Locust by the Catecholamine Metabolic Pathway. *Proc Natl Acad Sci* **2011**, *108*, 3882–3887, doi:10.1073/pnas.1015098108. 311  
312
15. Wang, X.; Fang, X.; Yang, P.; Jiang, X.; Jiang, F.; Zhao, D.; Li, B.; Cui, F.; Wei, J.; Ma, C.; et al. The Locust Genome Provides Insight into Swarm Formation and Long-Distance Flight. *Nat Commun* **2014**, *5*, 2957, doi:10.1038/ncomms3957. 313  
314
16. Bono, H. Meta-Analysis of Oxidative Transcriptomes in Insects. *Antioxidants* **2021**, *10*, 1–12, doi:10.3390/antiox10030345. 315
17. Ono, Y.; Bono, H. Multi-Omic Meta-Analysis of Transcriptomes and the Bibliome Uncovers Novel Hypoxia-Inducible Genes. *Biomedicines* **2021**, *9*, doi:10.3390/biomedicines9050582. 316  
317

18. Suzuki, T.; Ono, Y.; Bono, H. Comparison of Oxidative and Hypoxic Stress Responsive Genes from Meta-Analysis of Public Transcriptomes. *Biomedicines* **2021**, *9*, doi:10.3390/biomedicines9121830. 318  
319
19. Barrett, T.; Wilhite, S.E.; Ledoux, P.; Evangelista, C.; Kim, I.F.; Tomashevsky, M.; Marshall, K.A.; Phillippy, K.H.; Sherman, P.M.; Holko, M.; et al. NCBI GEO: Archive for Functional Genomics Data Sets—Update. *Nucleic Acids Res* **2012**, *41*, D991–D995, doi:10.1093/nar/gks1193. 320  
321  
322
20. Kodama, Y.; Shumway, M.; Leinonen, R. The Sequence Read Archive: Explosive Growth of Sequencing Data. *Nucleic Acids Res* **2012**, *40*, D54–D56, doi:10.1093/nar/gkr854. 323  
324
21. The NCBI SRA (Sequence Read Archive); NCBI—National Center for Biotechnology Information/NLM/NIH: Bethesda, MD, USA, 2021. 325  
326
22. Krueger, F. Trim Galore. Available Online: [https://www.bioinformatics.babraham.ac.uk/projects/trim\\_galore/](https://www.bioinformatics.babraham.ac.uk/projects/trim_galore/) (Accessed on 30 April 2021). 327  
328
23. Martin, M. Cutadapt Removes Adapter Sequences from High-Throughput Sequencing Reads. *EMBnet J* **2011**, *17*, 10, doi:10.14806/ej.17.1.200. 329  
330
24. Kim, D.; Paggi, J.M.; Park, C.; Bennett, C.; Salzberg, S.L. Graph-Based Genome Alignment and Genotyping with HISAT2 and HISAT-Genotype. *Nat Biotechnol* **2019**, *37*, 907–915, doi:10.1038/s41587-019-0201-4. 331  
332
25. Pertea, M.; Kim, D.; Pertea, G.M.; Leek, J.T.; Salzberg, S.L. Transcript-Level Expression Analysis of RNA-Seq Experiments with HISAT, StringTie and Ballgown. *Nat Protoc* **2016**, *11*, 1650–1667, doi:10.1038/nprot.2016.095. 333  
334
26. Patro, R.; Duggal, G.; Love, M.I.; Irizarry, R.A.; Kingsford, C. Salmon Provides Fast and Bias-Aware Quantification of Transcript Expression. *Nat Methods* **2017**, *14*, 417–419, doi:10.1038/nmeth.4197. 335  
336
27. Pertea, G.; Pertea, M. GFF Utilities: GffRead and GffCompare. *F1000Res* **2020**, *9*, 304, doi:10.12688/f1000research.23297.2. 337
28. Zhou, Y.; Zhou, B.; Pache, L.; Chang, M.; Khodabakhshi, A.H.; Tanaseichuk, O.; Benner, C.; Chanda, S.K. Metascape Provides a Biologist-Oriented Resource for the Analysis of Systems-Level Datasets. *Nat Commun* **2019**, *10*, 1523, doi:10.1038/s41467-019-09234-6. 338  
339  
340
29. Iga, M.; Kataoka, H. Recent Studies on Insect Hormone Metabolic Pathways Mediated by Cytochrome P450 Enzymes. *Biol Pharm Bull* **2012**, *35*, 838–843, doi.org/10.1248/bpb.35.838. 341  
342
30. Tanaka, S.; Harano, K.; Nishide, Y.; Sugahara, R. The Mechanism Controlling Phenotypic Plasticity of Body Color in the Desert Locust: Some Recent Progress. *Curr Opin Insect Sci* **2016**, *17*, 10–15, doi:10.1016/j.cois.2016.05.011. 343  
344
31. Yildirim, K.; Winkler, B.; Pogodalla, N.; Mackensen, S.; Baldenius, M.; Garcia, L.; Naffin, E.; Rodrigues, S.; Klämbt, C. Redundant Functions of the SLC5A Transporters Rumpel, Bumpel, and Kumpel in Ensheathing Glial Cells. *Biol Open* **2022**, *11*, doi:10.1242/bio.059128. 345  
346  
347
32. Mosca, T.J.; Luginbuhl, D.J.; Wang, I.E.; Luo, L. Presynaptic LRP4 Promotes Synapse Number and Function of Excitatory CNS Neurons. *Elife* **2017**, *6*, doi:10.7554/eLife.27347. 348  
349
33. Molina-Obando, S.; Vargas-Fique, J.F.; Henning, M.; Gür, B.; Schladt, T.M.; Akhtar, J.; Berger, T.K.; Silies, M. ON Selectivity in the Drosophila Visual System Is a Multisynaptic Process Involving Both Glutamatergic and GABAergic Inhibition. *Elife* **2019**, *8*, doi:10.7554/eLife.49373. 350  
351  
352
34. Wu, X.; Hu, S.; Kang, X.; Wang, C. Synaptotagmins: Beyond Presynaptic Neurotransmitter Release. *Neuroscientist* **2020**, *26*, 9–15, doi:10.1177/1073858419844497. 353  
354
35. Foquet, B.; Castellanos, A.A.; Song, H. Comparative Analysis of Phenotypic Plasticity Sheds Light on the Evolution and Molecular Underpinnings of Locust Phase Polyphenism. *Sci Rep* **2021**, *11*, 11925, doi:10.1038/s41598-021-91317-w. 355  
356
36. Xu, N.; Wei, S.-F.; Xu, H.-J. Transcriptome Analysis of the Regulatory Mechanism of FoxO on Wing Dimorphism in the Brown Planthopper, Nilaparvata lugens (Hemiptera: Delphacidae). *Insects* **2021**, *12*, 413, doi:10.3390/insects12050413. 357  
358
37. Dale, J.F.; Tobe, S.S. Biosynthesis and Titre of Juvenile Hormone during the First Gonotrophic Cycle in Isolated and Crowded Locusta migratoria Females. *J Insect Physiol* **1986**, *32*, 763–769, doi:10.1016/0022-1910(86)90079-X. 359  
360
38. Du, B.; Ding, D.; Ma, C.; Guo, W.; Kang, L. Locust Density Shapes Energy Metabolism and Oxidative Stress Resulting in Divergence of Flight Traits. *Proc Natl Acad Sci* **2022**, *119*, doi:10.1073/pnas.2115753118. 361  
362  
363
